# Supplementary material for: Heterochromatin loss as a determinant of progerin‐induced DNA damage in Hutchinson–Gilford Progeria
Source: PubMed Central journal article supplement (PMC7059134; doi:10.1111/acel.13108), 2020-02-22

A

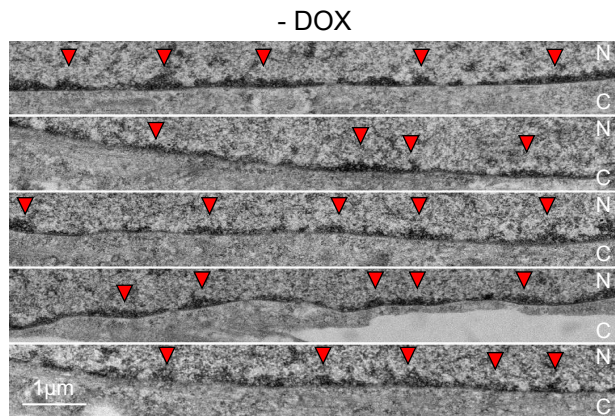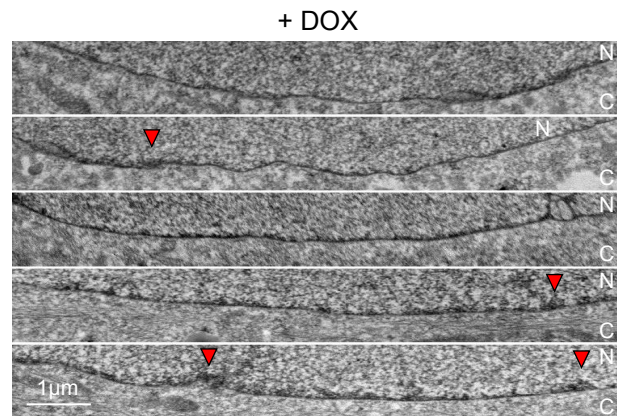

B

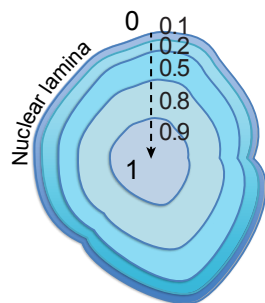

C

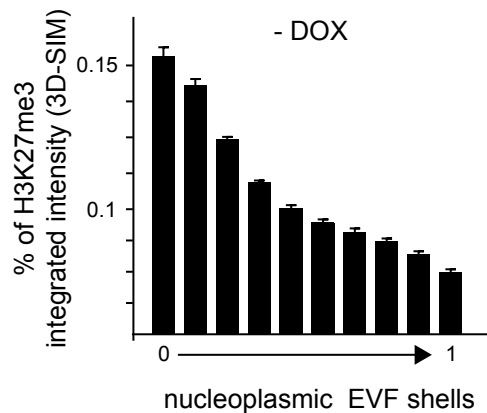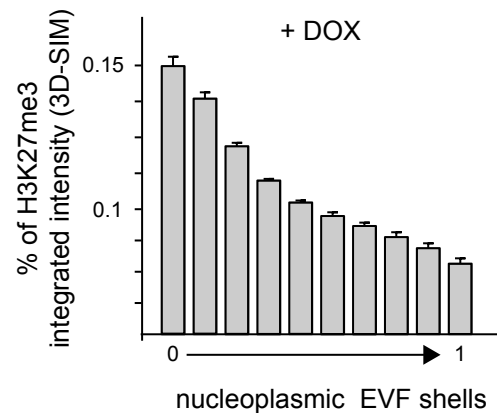

Supplement: ACEL-19-e13108-s001.pdf [file ACEL-19-e13108-s001.pdf]
